# Supplementary material
Source: PubMed Central journal article supplement (PMC6732883)

# Original blots for Figure 1D

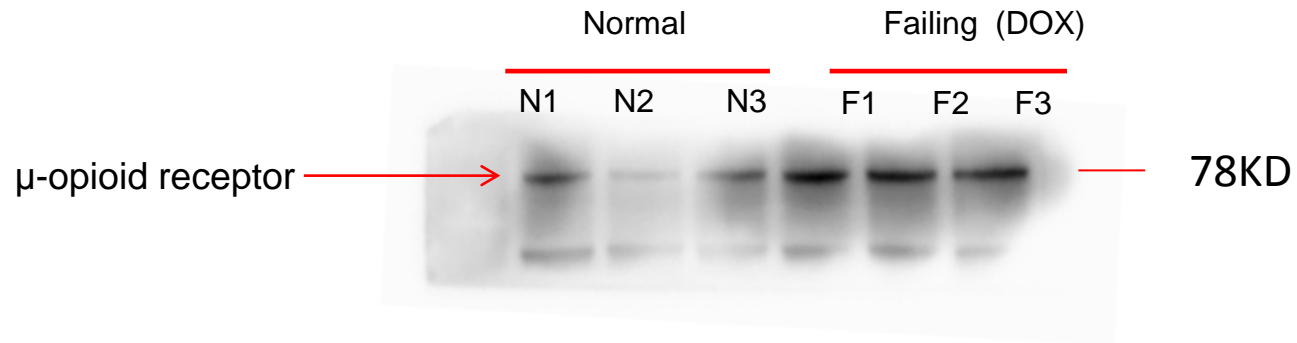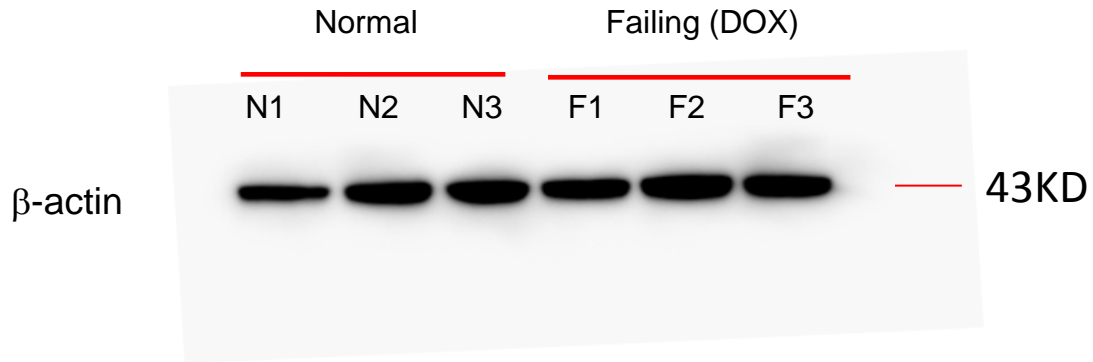

Original blots for Figure 1E

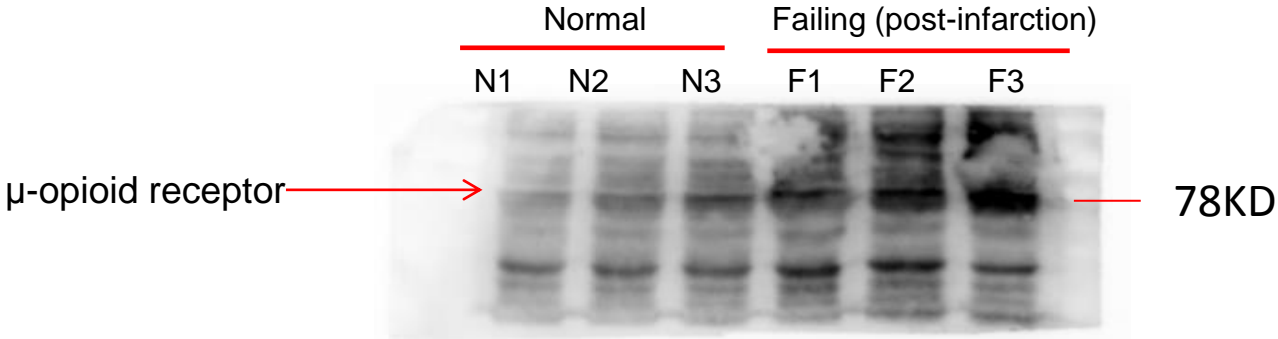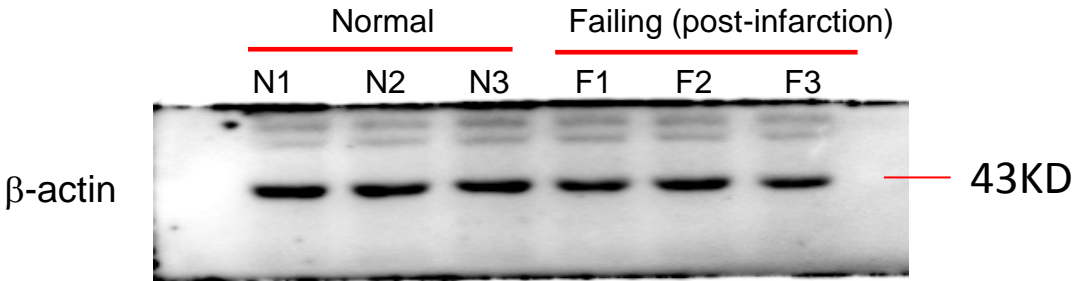

# Original blots for Figure 4B

1: Control, 2: DAMGO

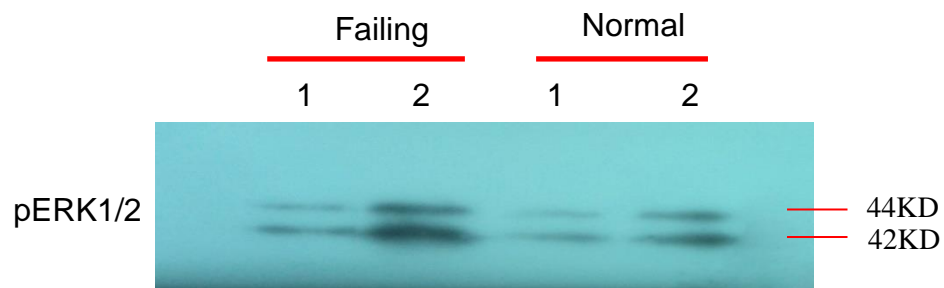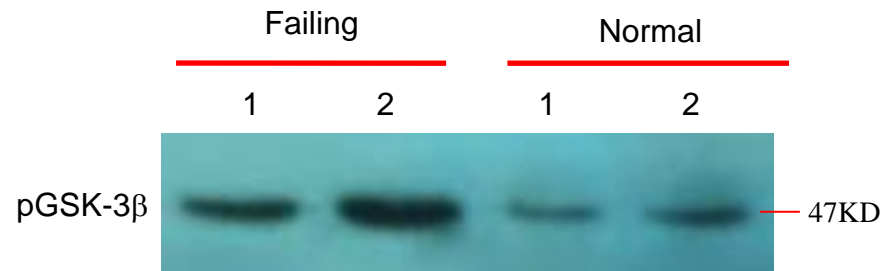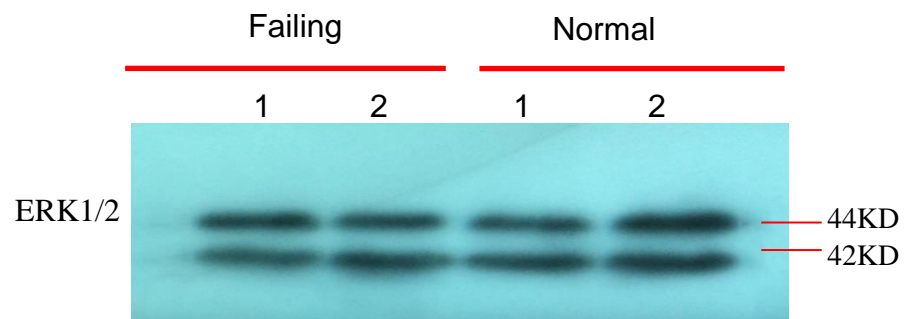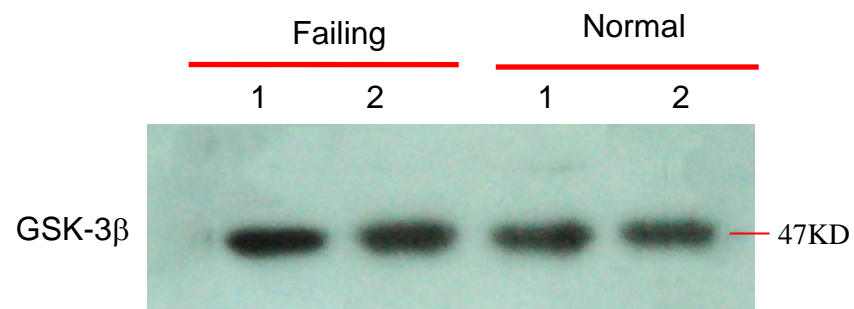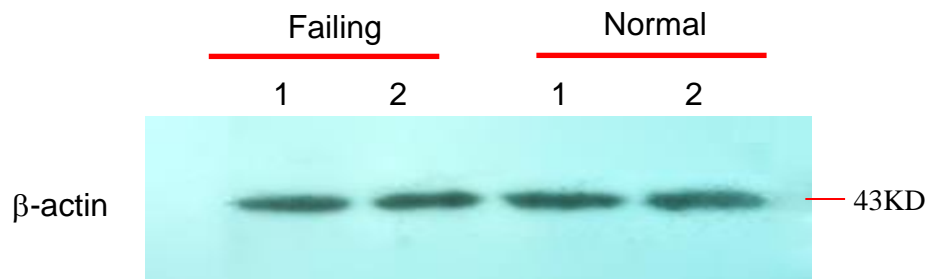

# Original blots for Figure 4E

1: Control, 2: morphine, 3: CTOP+morphine

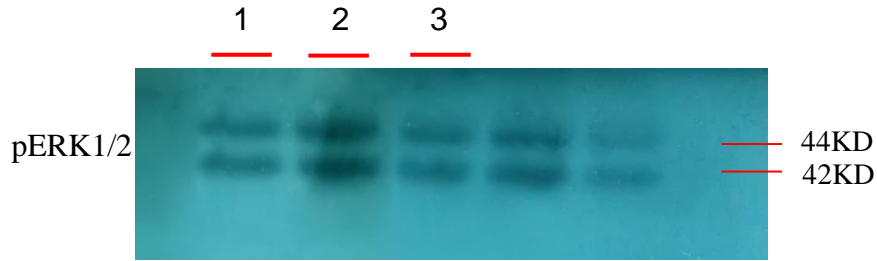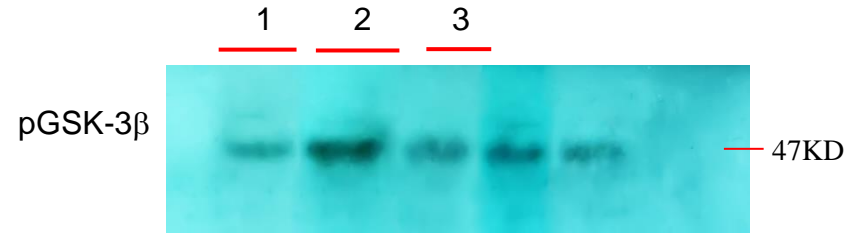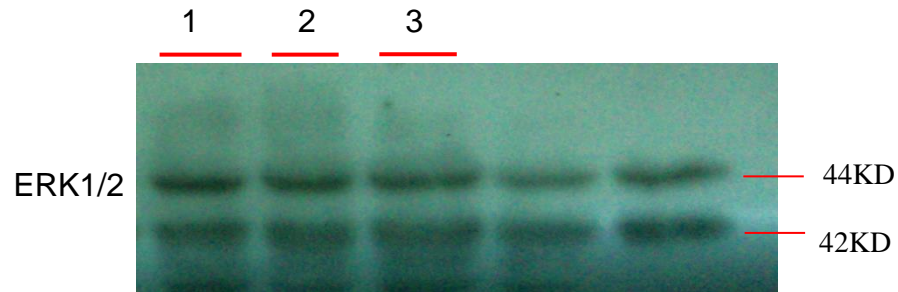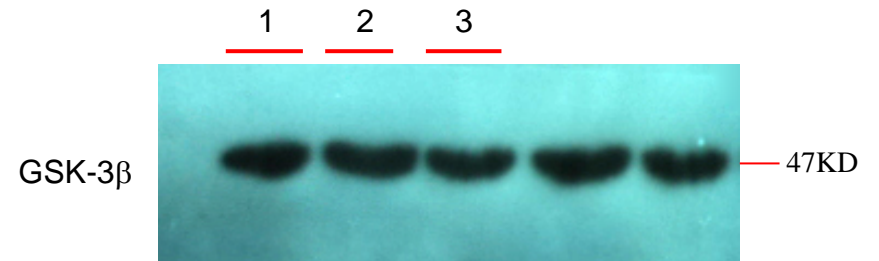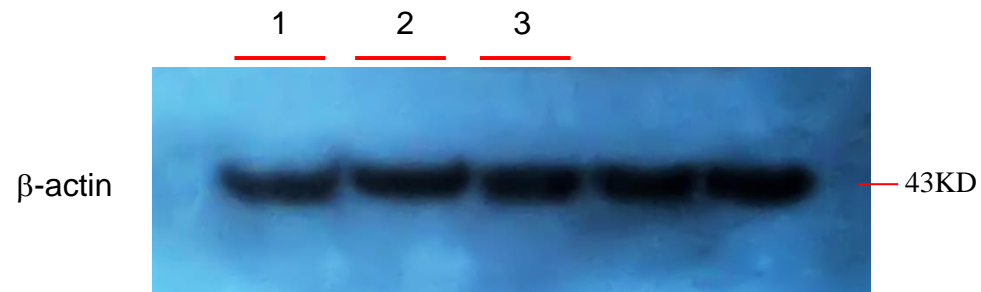

# Original blots for Figure 4 G

1: Control, 2: remifentanyl, 3: CTOP+remifentanyl

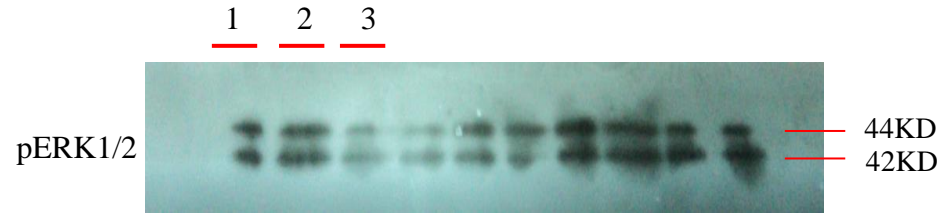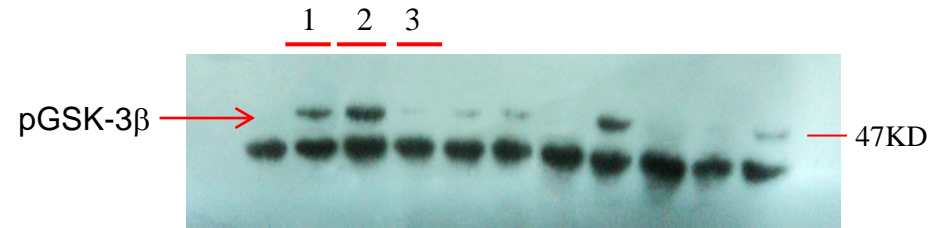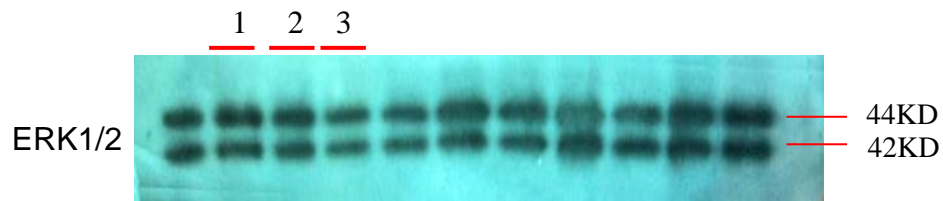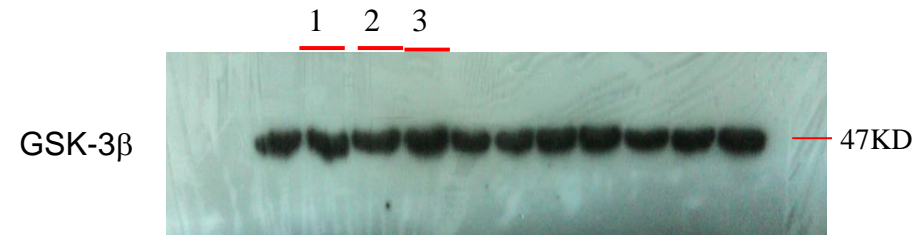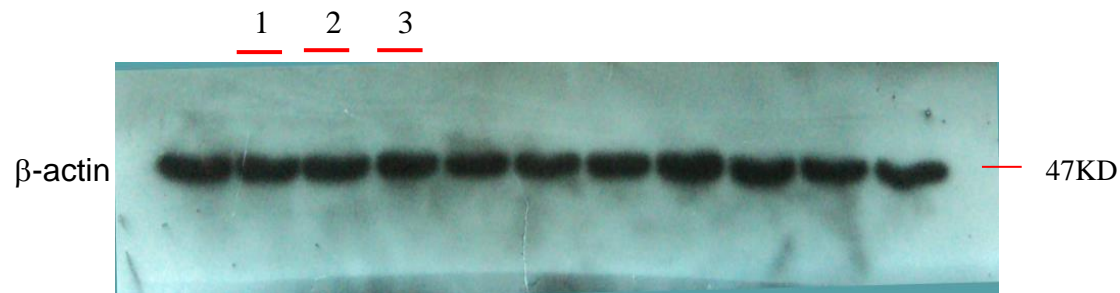

# Original blots for Figure 5 C and Supplemental Fig. 5

1: Control; 2: CTOP alone; 3: Control, 4: DAMGO; 5: DAMGO+PD98059; 6: PD98059 alone

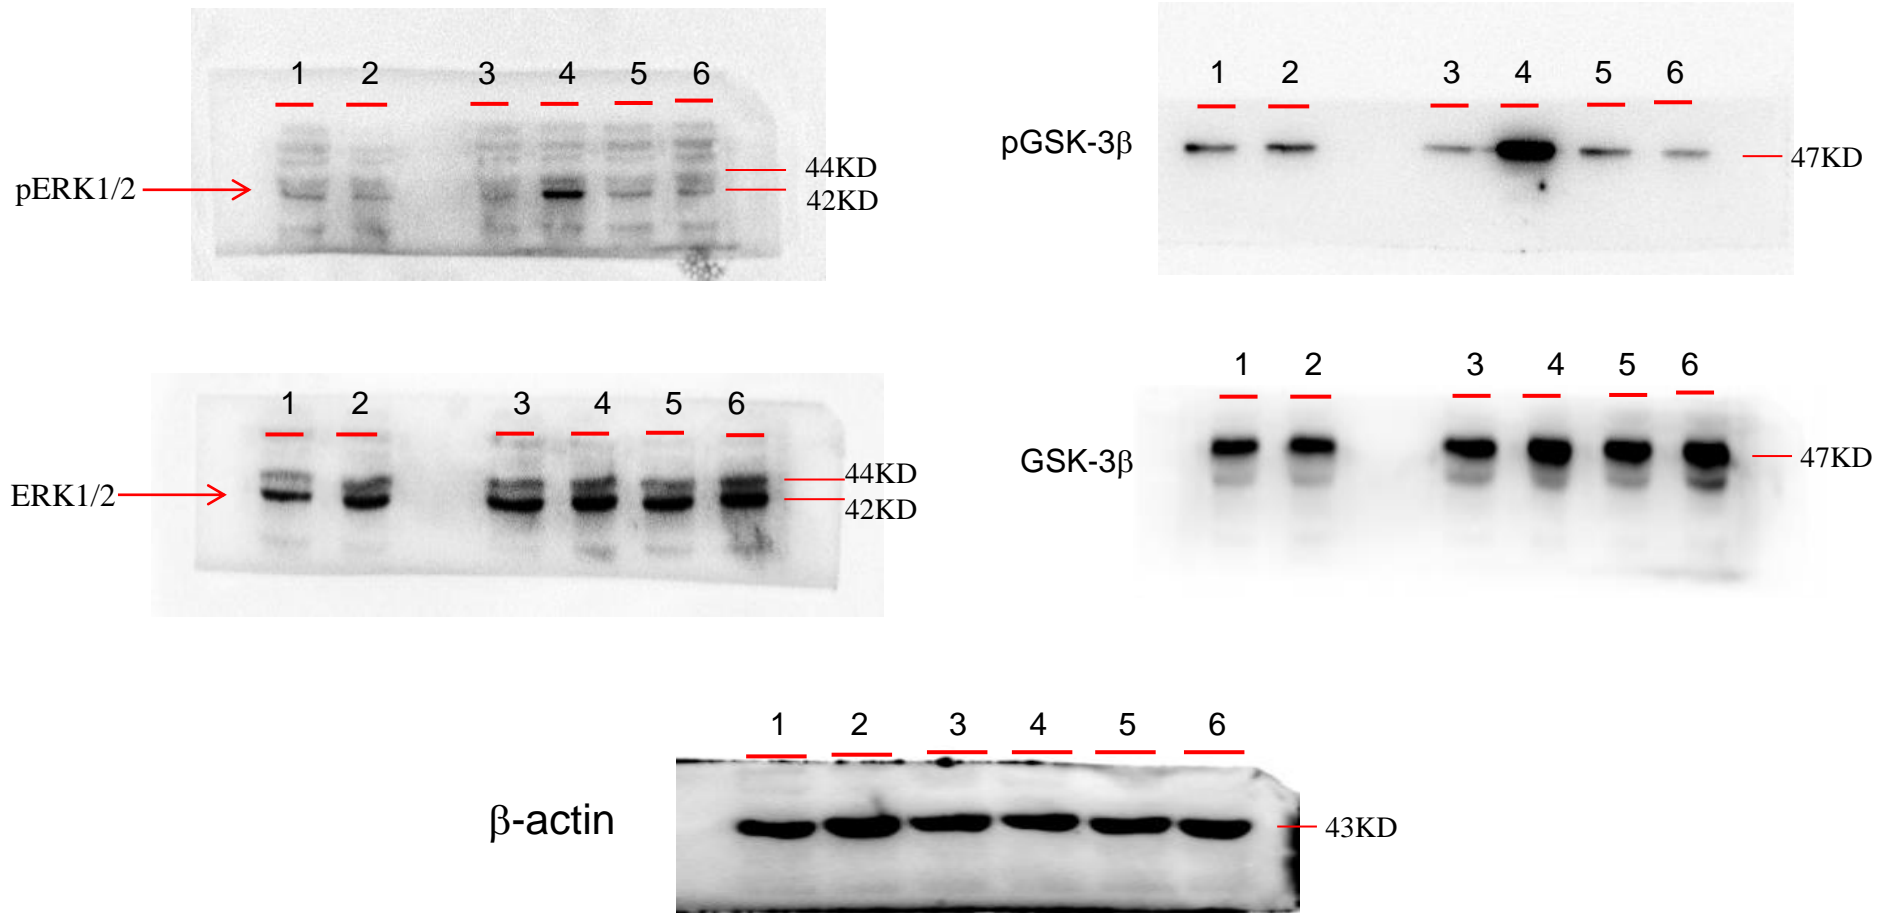

Supplement: mmc1.pdf [file mmc1.pdf]
